# Supplementary material for: High-Power Laser Powder Bed Fusion of Pure Copper for Simultaneous Achievement of High Density and Electrical Conductivity
Source: Research Square preprint supplement (doi:10.21203/rs.3.rs-8013933/v1), 2025-11-19
Supplement: Supplementary file 1 [file 594cdc695820d5de6c5aeb1f.xlsx]

## Sheet: Figure 1
Ref	Title	author	AM Process	url	Equipment	Beam diameter (mm)	Min. Laser power (W)	Max. Laser power(W)	Min. Scanning speed(mm/s)	Max. Scanning speed(mm/s)	Min. hatch distance(mm)	Max. hatch distance(mm)	Min. Layer thickness (mm)	Max. layer thickness (mm)
2	Processing of pure copper by powder bed fusion with infrared laser	Flaviana Calignano, Alessandro Bove, Matteo Pavese	L-PBF	https://www.sciencedirect.com/science/article/pii/S2590123025005754	Print Sharp 250 (M1) & EOSINT M270 Dual Mode (M2)	0.1	185	500	180	1000	0.05	0.07	0.03	0.03
10	Laser-based powder bed fusion additive manufacturing of pure copper	Suraj Dinkar Jadhav	L-PBF	https://doi.org/10.1016/j.addma.2021.101990	in-house	0.0375	200	500	100	1000	0.09	0.09	0.03	0.03
16	Microstructures and mechanical properties of pure copper manufactured by high-strength laser powder bed fusion	Yi Wei, Genyu Chen, Zhikang Xiao, Yi Zhang, Yunlong Zhou, Xufei Liu, Wei Li, Jianbo Xu	L-PBF	https://www.sciencedirect.com/science/article/pii/S0030399224015925	HANS M100 HS-LPBF system (Han’s Laser Smart Equipment Group, Shenzhen, China)	0.025	200	500	600	7000	0.04	0.11	0.02	0.1
19	Anisotropic material properties of pure copper with fine-grained microstructure fabricated by laser powder bed fusion process	Shuo Qu	L-PBF	https://doi.org/10.1016/j.addma.2022.103082	in-house	0.025	100	240	200	900	0.01	0.07	0.01	0.01
20	Influence of selective laser melting process parameters on texture evolution in pure copper	Suraj Dinkar Jadhav	L-PBF	https://doi.org/10.1016/j.jmatprotec.2019.02.022	in-house	0.04	600	800	200	600	0.07	0.09	0.03	0.03
22	High-precision laser powder bed fusion processing of pure copper	Shuo Qu	L-PBF	https://doi.org/10.1016/j.addma.2021.102417	in-house	0.025	100	240	200	900	0.01	0.07	0.01	0.01
26	Mechanical and electrical properties of selective laser-melted parts produced from surface-oxidized copper powder	Suraj Dinkar Jadhav	L-PBF	https://doi.org/10.1002/mdp2.94	in-house	0.04	300	500	200	1200	0.09	0.09	0.03	0.03
27	Influence of Carbon Nanoparticle Addition (and Impurities) on Selective Laser Melting of Pure Copper	Suraj Dinkar Jadhav	L-PBF	https://doi.org/10.3390/ma12152469	in-house	0.06	650	900	400	1000	0.12	0.2	0.03	0.03
28	Pure copper components fabricated by cold spray (CS) and selective laser melting (SLM) technology	Jian Huang	L-PBF	https://doi.org/10.1016/j.surfcoat.2020.125936	EOS M290	0.1	300	300	600	600	0.08	0.08	0.03	0.03
29	Microstructure and mechanical properties of pure copper manufactured by selective laser melting	Xingchen Yan	L-PBF	https://doi.org/10.1016/j.msea.2020.139615	EOS M290	0.1	150	350	200	1000	0.08	0.08	0.03	0.03
30	Selective Laser Melting of Pure Copper	Toshi-Taka Ikeshoji	L-PBF	https://doi.org/10.1007/s11837-017-2695-x	in-house	0.1	800	800	300	300	0.025	0.12	0.05	0.05
31	Selective laser melting of pure Cu with a 1 kW single mode fiber laser	M. Colopi	L-PBF	https://doi.org/10.1016/j.procir.2018.08.030	in-house	0.078	200	1000	1000	4000	0.07	0.07	0.05	0.1
32	Limits and solutions in processing pure Cu via selective laser melting using a high-power single-mode fiber laser	M. Colopi	L-PBF	https://doi.org/10.1007/s00170-019-04015-3	in-house	0.078	600	1000	1000	5500	0.07	0.1	0.05	0.05
33	Process of Pure Copper Fabricated by Selective Laser Melting (SLM) Technology under Moderate Laser Power with Re-Melting Strategy	Rong Hu	L-PBF	https://doi.org/10.3390/ma16072642	DiMetel-300	0.075	300	400	100	1000	0.06	0.1	0.05	0.1
34	Laser powder bed fusion of pure copper electrodes	Yahya Aghayar	L-PBF	https://www.sciencedirect.com/science/article/pii/S026412752400114X	EOS M290	0.1	380	380	300	300	0.14	0.14	0.03	0.03

## Sheet: DoE and result
No.	Part	Laser power	Scanning speed	Hatch distance	Layer thickness	Energy density	Relative density (%)	Electrical conductivity (as-built) (%, IACS)	Ra (as-built)	Electrical conductivity (after polishing)	grain size	M.L.I
A01	A	700	600	0.18	0.04	162.037	0.964919	97.7333	7.947	99.1
A02	A	700	600	0.21	0.04	138.889	0.980624	98.1333	6.726	99.1	49.4283	15.3781
A03	A	700	600	0.24	0.04	121.528	0.975835	98.6333	6.946	99.8667
A04	A	700	650	0.18	0.04	149.573	0.967035	98.5667	8.484	99.6333
A05	A	700	650	0.21	0.04	128.205	0.978285	98.5333	6.753	99.4
A06	A	700	650	0.24	0.04	112.179	0.976169	98.5667	6.957	99
A07	A	700	700	0.18	0.04	138.889	0.975946	98.5	6.765	99.2
A08	A	700	700	0.21	0.04	119.048	0.968372	98	6.884	97.4333
A09	A	700	700	0.24	0.04	104.167	0.954449	97.4667	8.24	97
A10	A	700	750	0.18	0.04	129.63	0.958904	98	7.92	97
A11	A	700	750	0.21	0.04	111.111	0.956677	98	6.666	98.1
A12	A	700	750	0.24	0.04	97.2222	0.959684	98.2333	8.27	97.8667
A13	A	700	800	0.18	0.04	121.528	0.961912	98.1	8.1	97.8667
A14	A	700	800	0.21	0.04	104.167	0.955897	98.7	7.398	98.7667
A15	A	700	800	0.24	0.04	91.1458	0.949437	98.4	7.908	96.7	50.7326	12.9538
A16	A	800	600	0.18	0.04	185.185	0.988644	98.8333	6.551	100.033
A17	A	800	600	0.21	0.04	158.73	0.971379	98.0333	8.593	99.5667
A18	A	800	600	0.24	0.04	138.889	0.978174	98.4667	8.527	99.4667
A19	A	800	650	0.18	0.04	170.94	0.980958	97.5667	8.584	98.9333
A20	A	800	650	0.21	0.04	146.52	0.984188	98.4	6.461	99.2333
A21	A	800	650	0.24	0.04	128.205	0.974944	98.2	7.255	98.6
A22	A	800	700	0.18	0.04	158.73	0.973496	98.1	7.692	99.1
A23	A	800	700	0.21	0.04	136.054	0.962357	97.7	8.646	98.5667
A24	A	800	700	0.24	0.04	119.048	0.972716	98	9.022	98.7333
A25	A	800	750	0.18	0.04	148.148	0.964808	97.7	7.801	98.2333
A26	A	800	750	0.21	0.04	126.984	0.948991	97.4333	9.107	98.4
A27	A	800	750	0.24	0.04	111.111	0.958236	97	9.072	97.2667
A28	A	800	800	0.18	0.04	138.889	0.971379	96.7667	9.223	98.2
A29	A	800	800	0.21	0.04	119.048	0.988644	97.3667	8.626	97.8333
A30	A	800	800	0.24	0.04	104.167	0.953224	97.3	9.105	97.8667
A31	A	900	600	0.18	0.04	208.333	0.988867	98.4333	7.977	99.2667	113.771	97.006
A32	A	900	600	0.21	0.04	178.571	0.987084	98.5667	6.649	99.7667
A33	A	900	600	0.24	0.04	156.25	0.987419	98.5667	7	99.6	62.7375	29.3612
A34	A	900	650	0.18	0.04	192.308	0.985302	98.3	6.982	99.7333
A35	A	900	650	0.21	0.04	164.835	0.982406	98	8.018	99.4333
A36	A	900	650	0.24	0.04	144.231	0.976614	97.1333	9.854	99.0667
A37	A	900	700	0.18	0.04	178.571	0.978285	96.5667	12.838	98.6
A38	A	900	700	0.21	0.04	153.061	0.982963	97.5	9.174	98.9
A39	A	900	700	0.24	0.04	133.929	0.977951	98.3	9.016	99
A40	A	900	750	0.18	0.04	166.667	0.9706	97.1	8.688	98.4667
A41	A	900	750	0.21	0.04	142.857	0.96503	97.5	8.987	98.7667
A42	A	900	750	0.24	0.04	125	0.977617	97	7.938	98.2667
A43	A	900	800	0.18	0.04	156.25	0.972604	97	8.614	98.5333
A44	A	900	800	0.21	0.04	133.929	0.965253	97	9.248	97.5333
A45	A	900	800	0.24	0.04	117.188	0.958236	95.6	11.364	95.2667	56.6267	13.2895
B01	B	756	722	0.22	0.04	118.988	0.952667	98.3	6.773	98.3
B02	B	822	633	0.22	0.04	147.566	0.96336	98.7667	8.408	99.2333
B03	B	778	744	0.23	0.04	113.663	0.947766	98.7	7.603	96.4333
B04	B	711	789	0.2	0.04	112.643	0.958125	99.0333	8.099	98.5333
B05	B	733	611	0.19	0.04	157.852	0.976837	99.2667	7.405	99.5
B06	B	867	700	0.18	0.04	172.024	0.966812	98.3	11.913	98.8
B07	B	844	656	0.24	0.04	134.019	0.95289	98.7	6.99	99.1667
B08	B	889	767	0.2	0.04	144.883	0.953335	97.6	11.733	98.1667
B09	B	800	678	0.21	0.04	140.469	0.963694	98.2667	9.565	97.9333
C01	C	700	589.941	0.18	0.04	164.8	0.963248	97.9333	9.295	98.3667
C02	C	700	505.663	0.21	0.04	164.8	0.971045	98.7	7.524	99.1667
C03	C	700	442.456	0.24	0.04	164.8	0.968372	98.5667	7.202	99.0667
C04	C	800	674.218	0.18	0.04	164.8	0.972048	97.7333	8.876	99.1333
C05	C	800	577.901	0.21	0.04	164.8	0.983631	98.8333	7.238	99.6333
C06	C	800	505.663	0.24	0.04	164.8	0.969931	98.9333	7.071	99.8333
C07	C	900	758.495	0.18	0.04	164.8	0.961243	96.7667	9.149	97.4333
C08	C	900	650.139	0.21	0.04	164.8	0.969597	98.4	9.249	99.3
C09	C	900	568.871	0.24	0.04	164.8	0.950439	97.9	8.319	99.2333
